# Supplementary material for: Prevalence, incidence and residual risk of transfusion transmitted viruses (HBV, HCV and HIV infections) in Lithuanian blood donors from 2004 to 2018: The incidence/window-period model study
Source: PubMed Central journal article supplement (PMC7894937; doi:10.1371/journal.pone.0246704), 2021-02-19
Supplement: pone.0246704.s001.pdf [file pone.0246704.s001.pdf]

| Number | Year | Donations<br>total | Donations<br>_RD | Donations<br>_FTD | Repea-<br>_donors | FT_donors | Donors<br>total | HIV_RD_p<br>os | HIV_FTD<br>pos | HSAg_R<br>D_pos | HSAg_FT<br>D_pos | anti_HCV<br>_RD_pos | anti_HCV_F<br>TD_pos | NAT_HIV<br>RD_tests | NAT_HIV<br>RD_pos | NAT_HIV<br>FTD_tests | NAT_HIV<br>FTD_pos | NAT_HIV<br>RD_tests | NAT_HIV<br>RD_pos | NAT_HBV<br>_RD_pos | NAT_HBV<br>_FTD_pos | NAT_HBV<br>_RD_tests | NAT_HBV<br>_RD_pos | NAT_HCV<br>_RD_pos | NAT_HCV<br>_FTD_pos | NAT_HCV<br>_RD_tests | NAT_HCV<br>_RD_pos | NAT_HCV<br>_FTD_tests | NAT_HCV<br>_FTD_pos | HIV_DWP-<br>ID-NAT | HBV_VD<br>WP ID-<br>NAT | HCV_DW<br>P ID-NAT |
|--------|------|--------------------|------------------|-------------------|-------------------|-----------|-----------------|----------------|----------------|-----------------|------------------|---------------------|----------------------|---------------------|-------------------|----------------------|--------------------|---------------------|-------------------|--------------------|---------------------|----------------------|--------------------|--------------------|---------------------|----------------------|--------------------|-----------------------|---------------------|--------------------|-------------------------|--------------------|
| 1      | 2004 | 84870              | 69715            | 15155             | 24578             | 15155     | 39733           | 0              | 31             | 16              | 299              | 120                 | 380                  | 0                   | 0                 | 0                    | 0                  | 0                   | 0                 | 0                  | 0                   | 0                    | 0                  | 0                  | 0                   | 0                    | 0                  | 0                     | 21                  | 42                 | 60                      |                    |
| 2      | 2005 | 90915              | 69130            | 21785             | 20388             | 21785     | 42173           | 48             | 2              | 245             | 148              | 471                 | 206                  | 0                   | 0                 | 0                    | 0                  | 0                   | 0                 | 0                  | 0                   | 0                    | 0                  | 0                  | 0                   | 0                    | 0                  | 0                     | 21                  | 42                 | 60                      |                    |
| 3      | 2006 | 92583              | 70899            | 21684             | 28992             | 21684     | 50676           | 47             | 43             | 117             | 233              | 190                 | 382                  | 0                   | 0                 | 0                    | 0                  | 0                   | 0                 | 0                  | 0                   | 0                    | 0                  | 0                  | 0                   | 0                    | 0                  | 0                     | 21                  | 42                 | 60                      |                    |
| 4      | 2007 | 92284              | 65666            | 26618             | 26357             | 26618     | 52975           | 24             | 49             | 17              | 344              | 134                 | 621                  | 0                   | 0                 | 0                    | 0                  | 0                   | 0                 | 0                  | 0                   | 0                    | 0                  | 0                  | 0                   | 0                    | 0                  | 21                    | 42                  | 60                 |                         |                    |
| 5      | 2008 | 97845              | 66430            | 31415             | 28291             | 31415     | 59706           | 10             | 11             | 23              | 345              | 92                  | 633                  | 0                   | 0                 | 0                    | 0                  | 0                   | 0                 | 0                  | 0                   | 0                    | 0                  | 0                  | 0                   | 0                    | 0                  | 16                    | 42                  | 60                 |                         |                    |
| 6      | 2009 | 94326              | 75986            | 18340             | 41679             | 18340     | 60039           | 3              | 39             | 12              | 230              | 100                 | 669                  | 0                   | 0                 | 0                    | 0                  | 0                   | 0                 | 0                  | 0                   | 0                    | 0                  | 0                  | 0                   | 0                    | 0                  | 16                    | 42                  | 60                 |                         |                    |
| 7      | 2010 | 107204             | 84665            | 22539             | 50124             | 22539     | 72663           | 16             | 8              | 14              | 174              | 74                  | 437                  | 0                   | 0                 | 0                    | 0                  | 0                   | 0                 | 0                  | 0                   | 0                    | 0                  | 0                  | 0                   | 0                    | 0                  | 16                    | 42                  | 60                 |                         |                    |
| 8      | 2011 | 87971              | 64937            | 23034             | 36581             | 23034     | 59615           | 5              | 11             | 10              | 129              | 90                  | 354                  | 0                   | 0                 | 0                    | 0                  | 0                   | 0                 | 0                  | 0                   | 0                    | 0                  | 0                  | 0                   | 0                    | 0                  | 16                    | 42                  | 60                 |                         |                    |
| 9      | 2012 | 88749              | 65827            | 22922             | 33410             | 22922     | 56332           | 13             | 16             | 21              | 146              | 105                 | 377                  | 65827               | 0                 | 22922                | 0                  | 65793               | 4                 | 22989              | 4                   | 65793                | 16                 | 22989              | 8                   | 4                    | 17                 | 3                     |                     |                    |                         |                    |
| 10     | 2013 | 61254              | 45648            | 15606             | 22170             | 15606     | 37776           | 7              | 4              | 3               | 77               | 38                  | 198                  | 45648               | 1                 | 15606                | 0                  | 46440               | 2                 | 14818              | 0                   | 46459                | 6                  | 14822              | 2                   | 4                    | 17                 | 3                     |                     |                    |                         |                    |
| 11     | 2014 | 66147              | 53457            | 12690             | 27225             | 12690     | 39915           | 3              | 5              | 0               | 70               | 24                  | 174                  | 53457               | 0                 | 12690                | 0                  | 50192               | 1                 | 16020              | 1                   | 50176                | 4                  | 15755              | 0                   | 4                    | 17                 | 3                     |                     |                    |                         |                    |
| 12     | 2015 | 70774              | 50437            | 20337             | 25148             | 20337     | 45525           | 5              | 2              | 1               | 74               | 24                  | 127                  | 50437               | 0                 | 20337                | 0                  | 52976               | 0                 | 17133              | 1                   | 52953                | 8                  | 17080              | 0                   | 4                    | 17                 | 3                     |                     |                    |                         |                    |
| 13     | 2016 | 73652              | 59462            | 14190             | 32919             | 14190     | 47109           | 2              | 4              | 1               | 83               | 24                  | 92                   | 59462               | 0                 | 14190                | 0                  | 58429               | 2                 | 14838              | 2                   | 58429                | 1                  | 14838              | 1                   | 4                    | 17                 | 3                     |                     |                    |                         |                    |
| 14     | 2017 | 67817              | 54465            | 13352             | 31538             | 13352     | 44890           | 3              | 1              | 6               | 72               | 10                  | 85                   | 54442               | 0                 | 13352                | 0                  | 54442               | 0                 | 13157              | 1                   | 54442                | 0                  | 13157              | 2                   | 4                    | 17                 | 3                     |                     |                    |                         |                    |
| 15     | 2018 | 69177              | 56017            | 13160             | 32488             | 13160     | 45648           | 3              | 2              | 1               | 51               | 11                  | 38                   | 55938               | 0                 | 12978                | 0                  | 55938               | 2                 | 12978              | 2                   | 55938                | 0                  | 12978              | 0                   | 4                    | 17                 | 3                     |                     |                    |                         |                    |
